# Supplementary material
Source: Springer Nature journal article supplement (https://www.springermedizin.de/resource/supplementary/13047_2013_573_MOESM1_ESM.pdf/9663996)

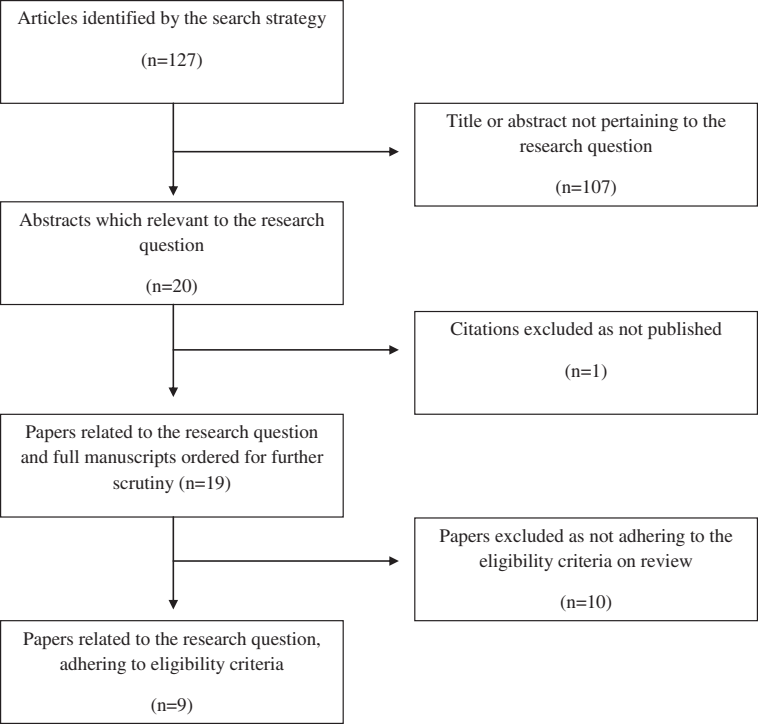

Supplement: MOESM1 [file 9663996]
